# Supplementary material for: Two optimized methods for the quantification of anthropogenic and biogenic markers in aerosol samples using liquid chromatography mass spectrometry and gas chromatography mass spectrometry
Source: Copernicus journal article supplement (doi:10.5194/amt-19-1-2026), 2026-01-05
Supplement: Supplementary file 1 [file amt-19-1-2026-supplement.pdf]

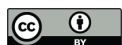

*Supplement of*

**Two optimized methods for the quantification of anthropogenic and biogenic markers in aerosol samples using liquid chromatography mass spectrometry and gas chromatography mass spectrometry**

**Diana L. Pereira et al.**

*Correspondence to:* Diana L. Pereira ([diana.pereiraguevara@helsinki.fi](mailto:diana.pereiraguevara@helsinki.fi)) and Aline Gratien ([aline.gratien@lisa.ipsl.fr](mailto:aline.gratien@lisa.ipsl.fr))

The copyright of individual parts of the supplement might differ from the article licence.

**Table S1.** List of compounds, solvents and gases with their characteristics used during the method development and analysis in the UPLC/ESI-MSQTOFMS and GC-MS.

| Compound name                                        | CAS #       | Molecular formula                                                            | Weight | Manufacturer        | Purity (%) | Detection technique |
|------------------------------------------------------|-------------|------------------------------------------------------------------------------|--------|---------------------|------------|---------------------|
| <b>Solvents</b>                                      |             |                                                                              |        |                     |            |                     |
| Methanol ULC/MS-CC/SFC                               | 67-56-1     | CHO <sub>3</sub> OH                                                          | 32     | Biosolve            | 99.99      | UPLC                |
| Acetonitrile ULC/MS-CC/SFC                           | 75-05-8     | C <sub>2</sub> H <sub>3</sub> N                                              | 41     | Biosolve            | 99.99      | UPLC                |
| Formic acid ULC/MS-CC/SFC                            | 64-18-6     | CH <sub>2</sub> O <sub>2</sub>                                               | 46     | Biosolve            | 99         | UPLC                |
| Water                                                | -           | H <sub>2</sub> O                                                             | 18     | Millipore           | Milli-Q    | UPLC/GC             |
| Acetonitrile HPLC                                    | 75-05-8     | C <sub>2</sub> H <sub>3</sub> N                                              | 41     | VWR chemical        | 99.95      | GC                  |
| <b>Cleaning material</b>                             |             |                                                                              |        |                     |            |                     |
| Neodisher LaboClean FLA                              | -           | KOH                                                                          | -      | Dr. Weigert         | -          | -                   |
| Neodisher N                                          | -           | H <sub>3</sub> PO <sub>4</sub> /C <sub>6</sub> H <sub>8</sub> O <sub>7</sub> | -      | Dr. Weigert         | -          | -                   |
| <b>Internal Standards and derivatisation reagent</b> |             |                                                                              |        |                     |            |                     |
| (1S)-(+)-camphor-10-sulfonic acid                    | 5872-08-2   | C <sub>10</sub> H <sub>16</sub> O <sub>4</sub> S                             | 232    | Sigma Aldrich       | 98         | UPLC                |
| Heptanoic acid                                       | 111-14-8    | C <sub>7</sub> H <sub>14</sub> O <sub>2</sub>                                | 130    | Sigma Aldrich       | 99         | GC                  |
| N,O-Bis(trimethylsilyl)trifluoroacetamide            | 25561-30-2  | C <sub>8</sub> H <sub>18</sub> F <sub>3</sub> NOSi <sub>2</sub>              | 257    | Sigma Aldrich       | 99         | GC                  |
| <b>Target organic compounds</b>                      |             |                                                                              |        |                     |            |                     |
| Cis-pinonic acid                                     | 61826-55-9  | C <sub>10</sub> H <sub>16</sub> O <sub>3</sub>                               | 184    | Sigma Aldrich       | 98         | UPLC/GC             |
| Pinic acid                                           | 28664-02-0  | C <sub>9</sub> H <sub>14</sub> O <sub>4</sub>                                | 186    | TRC (LGC Standards) | 95         | UPLC/GC             |
| Norpinic acid                                        | 3211-59-4   | C <sub>8</sub> H <sub>12</sub> O <sub>4</sub>                                | 172    | Sigma Aldrich       | >95        | UPLC                |
| Terebic acid                                         | 79-91-4     | C <sub>7</sub> H <sub>10</sub> O <sub>4</sub>                                | 158    | Sigma Aldrich       | >95        | UPLC                |
| 3-methyl-1,2,3-butanetricarboxylic acid              | 114701-91-6 | C <sub>8</sub> H <sub>12</sub> O <sub>6</sub>                                | 204    | TRC (LGC Standards) | 98         | UPLC                |
| (1S,2S,3R,5S)-(+)- Pinatediol                        | 18680-27-8  | C <sub>10</sub> H <sub>18</sub> O <sub>2</sub>                               | 170    | Sigma Aldrich       | 99         | GC                  |
| 1R-(+)-Nopinone                                      | 38651-65-9  | C <sub>9</sub> H <sub>14</sub> O                                             | 138    | Sigma Aldrich       | 98         | GC                  |
| α-methylglyceric acid                                | 21620-60-0  | C <sub>4</sub> H <sub>8</sub> O <sub>4</sub>                                 | 120    | Wonderchem          | 95         | GC                  |
| 2-methylerythritol                                   | 58698-37-6  | C <sub>5</sub> H <sub>12</sub> O <sub>4</sub>                                | 136    | Sigma Aldrich       | 90         | GC                  |
| 4-nitrocatechol                                      | 3316-09-4   | C <sub>6</sub> H <sub>5</sub> NO                                             | 155    | Sigma Aldrich       | 97         | UPLC/GC             |
| Syringaldehyde                                       | 134-96-3    | C <sub>9</sub> H <sub>10</sub> O <sub>4</sub>                                | 182    | Sigma Aldrich       | 97         | UPLC                |
| 4-methyl phthalic acid                               | 4316-23-8   | C <sub>9</sub> H <sub>8</sub> O <sub>4</sub>                                 | 180    | Sigma Aldrich       | 99         | UPLC                |
| Phthalic acid                                        | 88-99-3     | C <sub>8</sub> H <sub>6</sub> O <sub>4</sub>                                 | 166    | Sigma Aldrich       | 99.5       | UPLC/GC             |
| 2,3-dihydroxy-4-oxopentanoic acid                    | 37520-06-2  | C <sub>5</sub> H <sub>8</sub> O <sub>5</sub>                                 | 148    | TRC (LGC Standards) | 98         | GC                  |
| 2,5-dihydroxy benzoic acid                           | 490-79-9    | C <sub>7</sub> H <sub>6</sub> O <sub>4</sub>                                 | 154    | Sigma Aldrich       | 98         | UPLC                |
| Succinic acid                                        | 14493-42-6  | C <sub>4</sub> H <sub>6</sub> O <sub>4</sub>                                 | 118    | Sigma Aldrich       | 99         | GC                  |
| Glycolic acid                                        | 79-14-1     | C <sub>2</sub> H <sub>4</sub> O <sub>3</sub>                                 | 76     | Sigma Aldrich       | 99         | GC                  |
| 3-acetyl-benzoic acid                                | 586-42-5    | C <sub>9</sub> H <sub>8</sub> O <sub>3</sub>                                 | 164    | Sigma Aldrich       | 98         | UPLC                |
| Salicylic acid                                       | 69-72-7     | C <sub>7</sub> H <sub>6</sub> O <sub>3</sub>                                 | 138    | Sigma Aldrich       | 99         | UPLC                |
| o-toluic acid                                        | 118-90-1    | C <sub>8</sub> H <sub>8</sub> O <sub>2</sub>                                 | 136    | Acros organic       | 99         | GC                  |
| 4-nitrophenol                                        | 100-02-7    | C <sub>6</sub> H <sub>5</sub> NO <sub>3</sub>                                | 139    | Sigma Aldrich       | 100        | UPLC                |
| 2-methyl-4-nitrophenol                               | 99-53-6     | C <sub>7</sub> H <sub>7</sub> NO <sub>3</sub>                                | 153    | Sigma Aldrich       | 97         | UPLC/GC             |
| 2-hydroxy-3methylbenzaldehyde                        | 824-42-0    | C <sub>8</sub> H <sub>8</sub> O <sub>2</sub>                                 | 136    | Sigma Aldrich       | 97         | GC                  |
| Azelaic acid                                         | 123-99-9    | C <sub>9</sub> H <sub>16</sub> O <sub>4</sub>                                | 188    | Fluka Chemika       | 99         | UPLC                |
| <b>Gases</b>                                         |             |                                                                              |        |                     |            |                     |
| Helium                                               | 7440-59-7   | He                                                                           | 4      | Air Liquide         | 99.9       | GC                  |

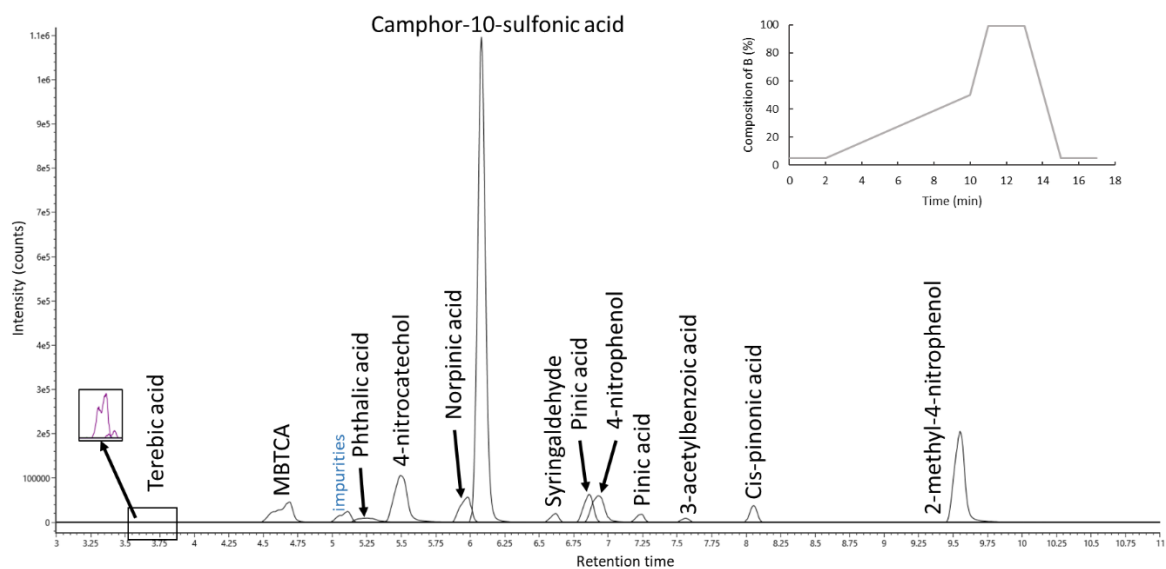

**Figure S1.** Overlap TIC chromatograms of individual compounds injected in the UPLC/ESI-IMS-QTOFMS using a 17 min elution method with methanol as organic solvent.

30

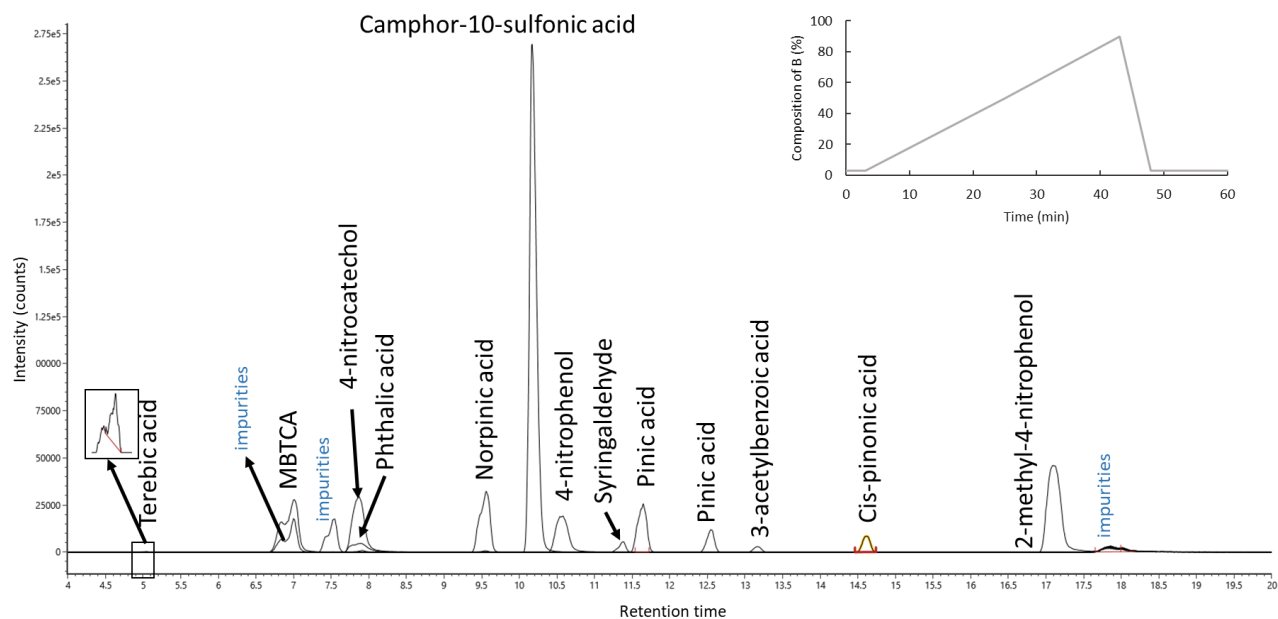

**Figure S2.** Overlap TIC chromatograms of individual compounds injected in the UPLC/ESI-IMS-QTOFMS using a 60 min elution method with methanol as organic solvent.

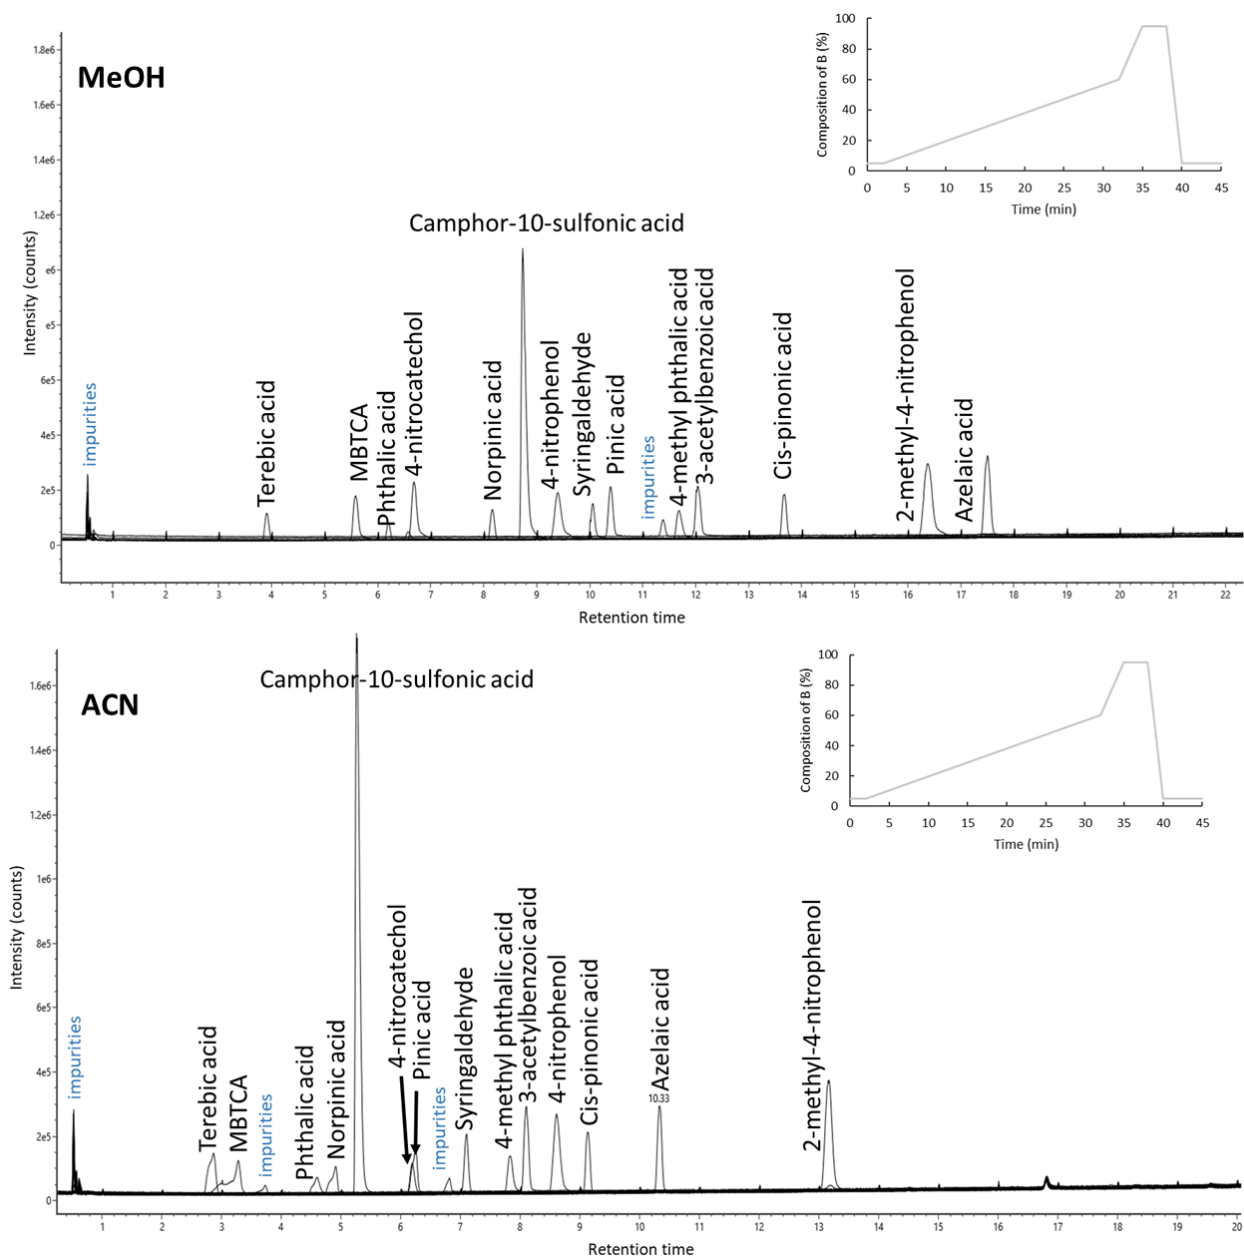

**Figure S3.** TIC chromatograms of a mixture of anthropogenic and biogenic standards injected in the UPLC/ESI-IMS-QTOFMS using a 45 min elution method with methanol (MeOH, top panel) and acetonitrile (ACN, bottom panel) as organic solvent.

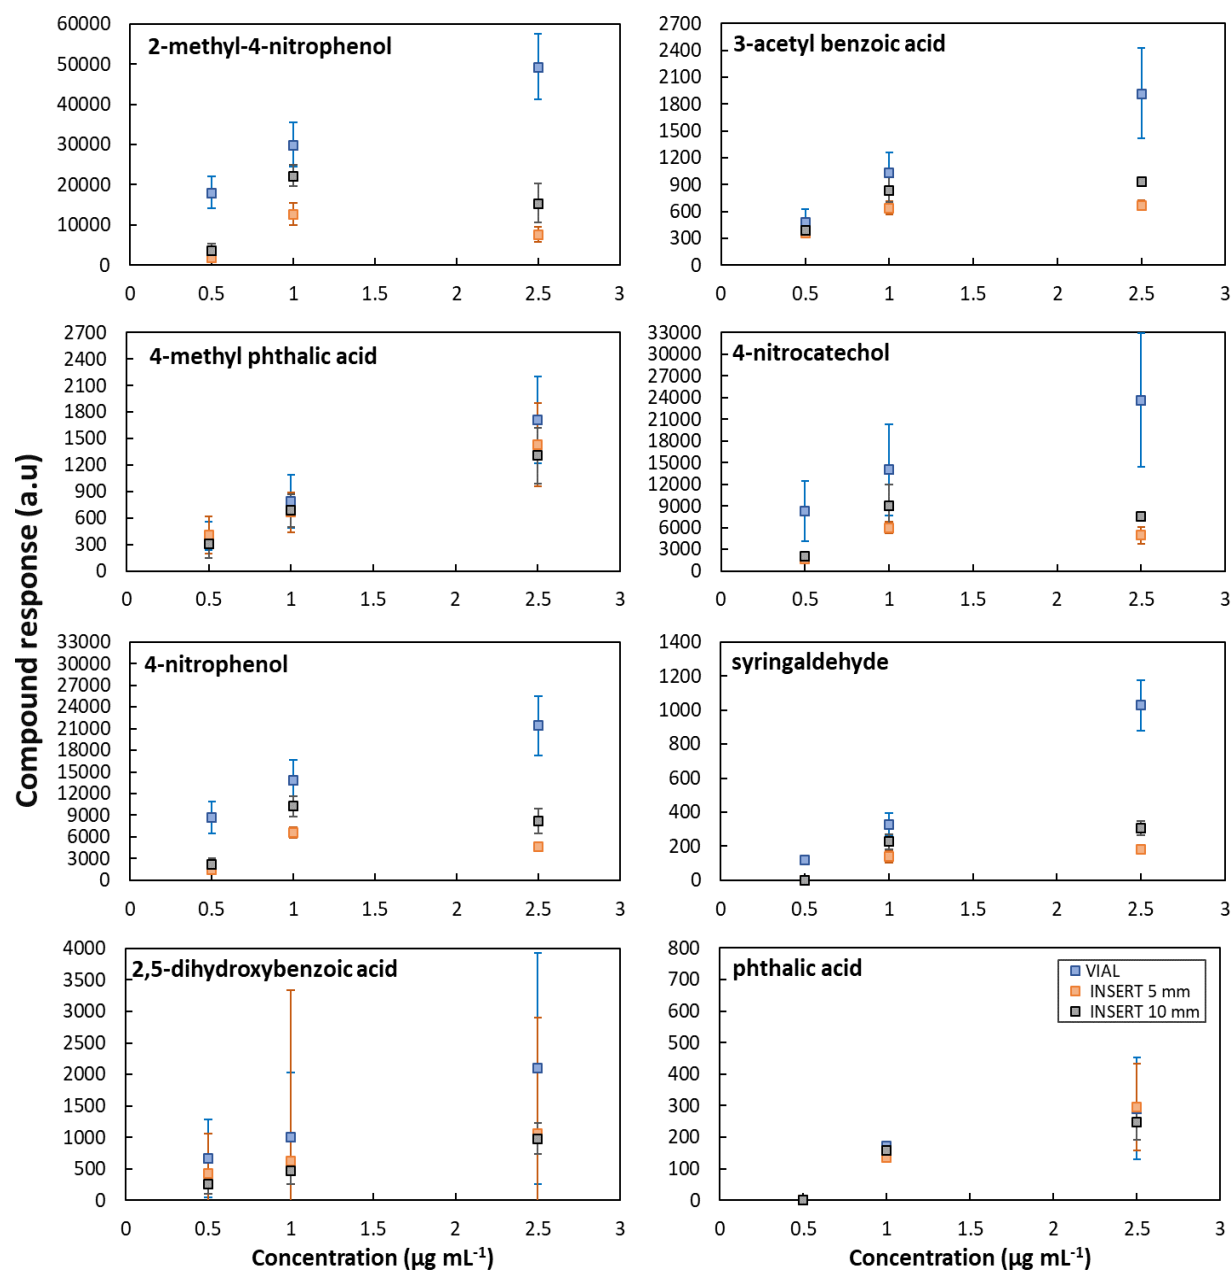

**Figure S4.** Comparison of the variability of compound responses in arbitrary units for samples injected in UPLC/ESI-IMS-QTOFMS from vials without inserts (vials) and vials with inserts (inserts), both without filter extraction. The needle position was tested at 5 and 10 mm from the insert bottom.

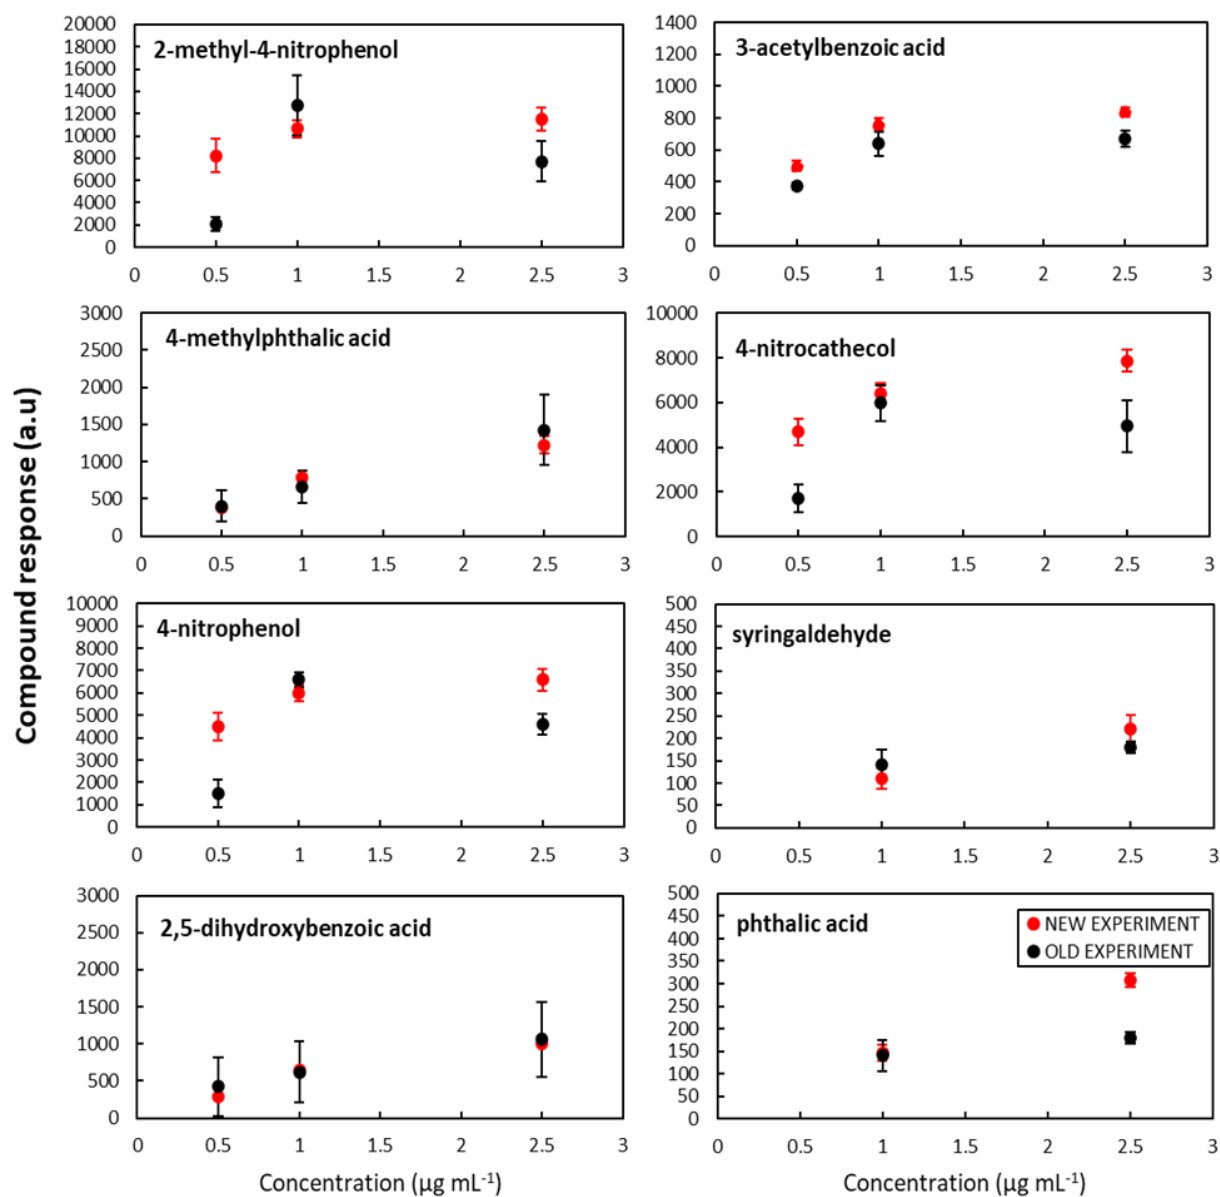

**Figure S5.** Comparison of the variability of compound responses in arbitrary units for samples injected in UPLC/ESI-IMS-QTOFMS from vials during different dates, labelled as new (14/03/2023) and old (03/03/2023), both without filter extraction.

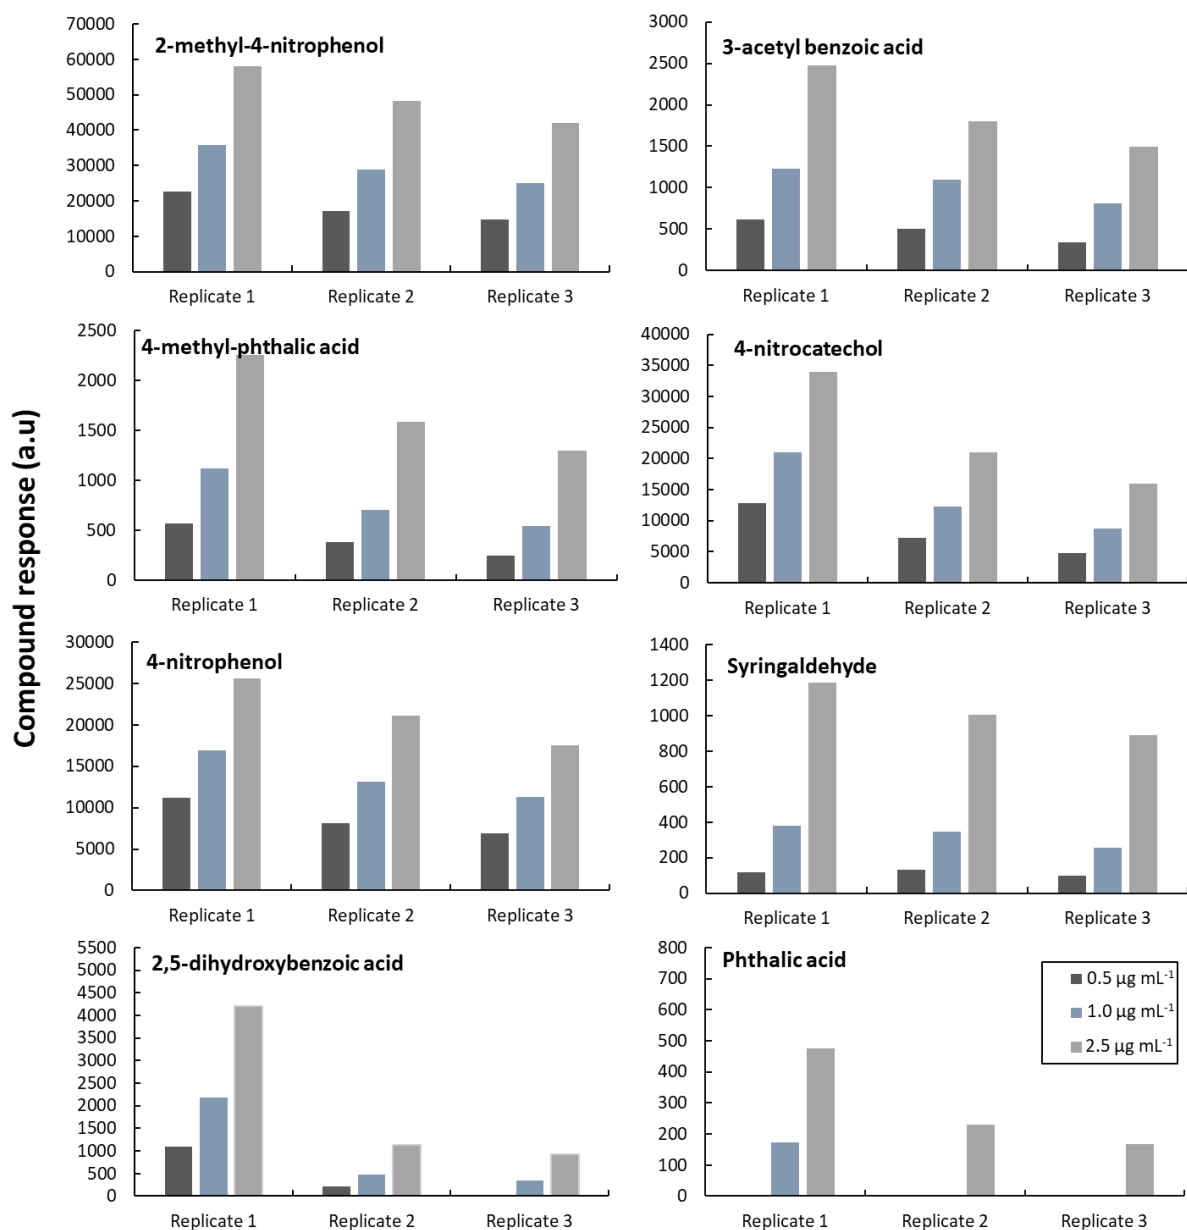

**Figure S6.** Example of signal loss from different compounds analyzed by non-consecutive replicates at 8 h time span between injections at three concentrations.

50

**Table S2.** Stability test performed for the target anthropogenic markers in 50/50 ultrapure water/acetonitrile. Percentage values represent the variability between injections performed by consecutive triplicates.

| Compound name             | 1.5 $\mu\text{g mL}^{-1}$ | 2.5 $\mu\text{g mL}^{-1}$ |
|---------------------------|---------------------------|---------------------------|
| 2-methyl-4-nitrophenol    | 6.1%                      | 4.3%                      |
| 3-acetylbenzoic acid      | 2.6%                      | 4.3%                      |
| 4-methylphthalic acid     | 2.8%                      | 9.2%                      |
| 4-nitrocatechol           | 6.0%                      | 5.0%                      |
| 4-nitrophenol             | 6.2%                      | 3.3%                      |
| Syringaldehyde            | 6.8%                      | 11.9%                     |
| 2,5-dihydroxybenzoic acid | 1.9%                      | 15.5%                     |
| Phthalic acid             | 2.9%                      | 6.8%                      |

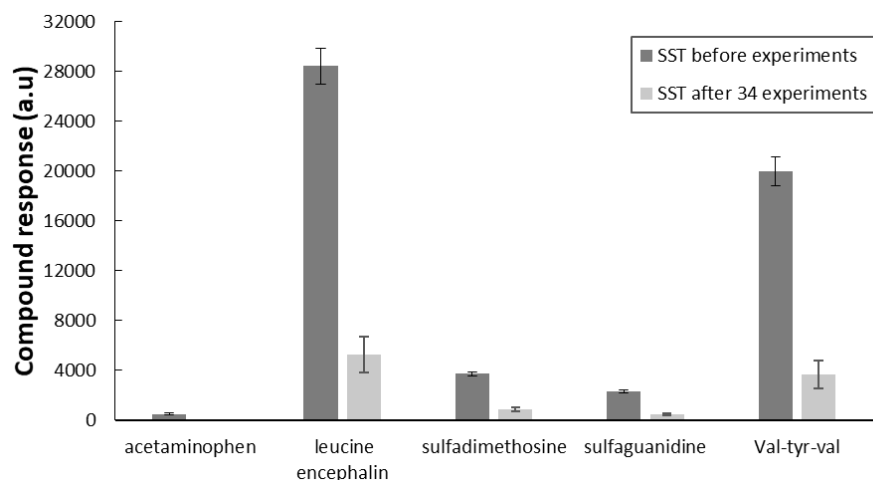

55

**Figure S7.** Response in arbitrary units for a control solution at the beginning of the experiments and after injecting a sequence of 34 injections (approx. 25 h).

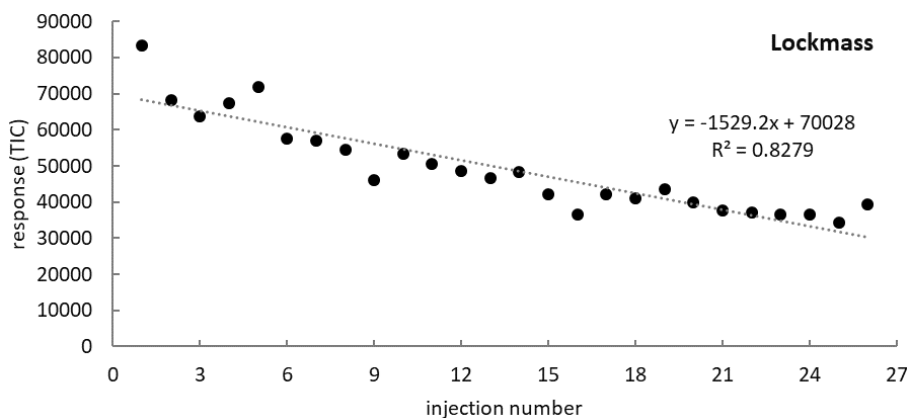

60

**Figure S8.** LockMass (Leucine-Enkephalin solution) evaluation of the summed response in arbitrary units for individual infusions of 45 min in a sequence of 25 injections (transition time approx. 19 h).

**Table S3.** Compound response in arbitrary units at different values of cone gas flow (50, 100, 150 L h<sup>-1</sup>) used for the identification of anthropogenic compounds.

65

| Component name            | Response at 50 L h <sup>-1</sup> | Response at 100 L h <sup>-1</sup> | Response at 150 L h <sup>-1</sup> |
|---------------------------|----------------------------------|-----------------------------------|-----------------------------------|
| 4-nitrocatechol           | 30433                            | 32143                             | 34787                             |
| Syringaldehyde            | 1395                             | 1452                              | 1645                              |
| 4-methylphthalic acid     | 4010                             | 3875                              | 3856                              |
| Phthalic acid             | 1193                             | 1118                              | 1142                              |
| 2,5-dihydroxybenzoic acid | 3742                             | 3818                              | 3765                              |
| 3-acetylbenzoic acid      | 3234                             | 3181                              | 3260                              |
| 2-methyl-4-nitrophenol    | 49818                            | 53639                             | 55575                             |
| 4-nitrophenol             | 24418                            | 24791                             | 26406                             |



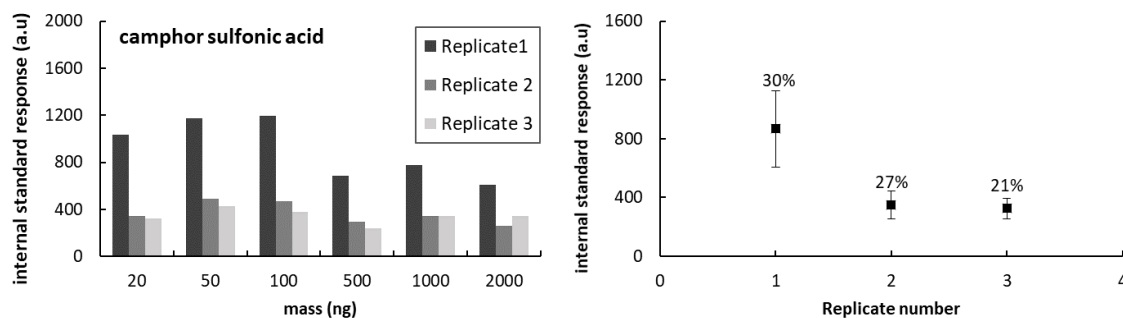

**Figure S9.** Analysis of the replicate's variability of internal standard response in arbitrary units. Transition time between replicates is 14 hours approximately. In the right, the squares show the mean response value with their standard deviation and the percentage shows the variability calculated considering measurements from the left.

70

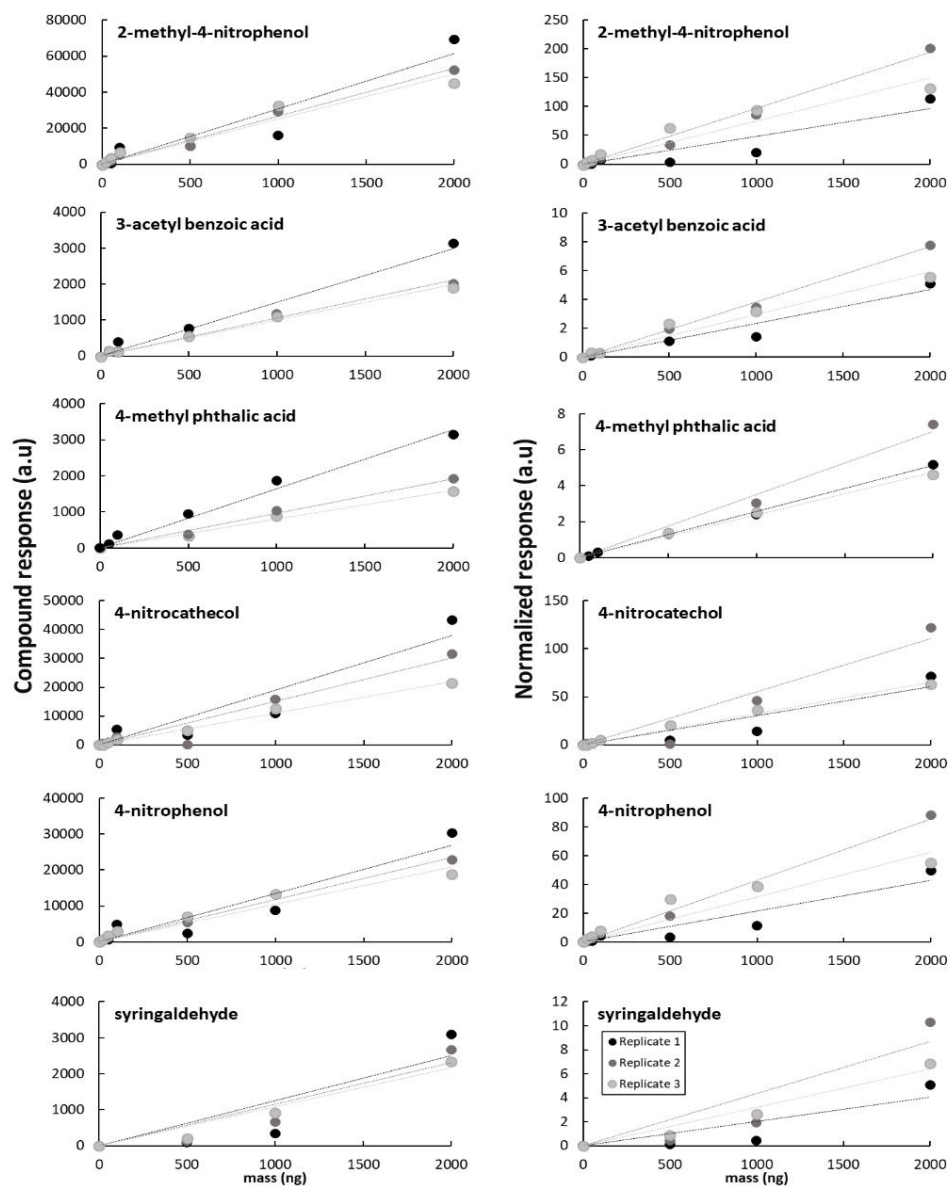

**Figure S10.** Calibration curves observed for the compound direct response (left) and response normalized to the internal standard camphor sulfonic acid (right).

## HPLC ACN+ BSTFA (without extraction)

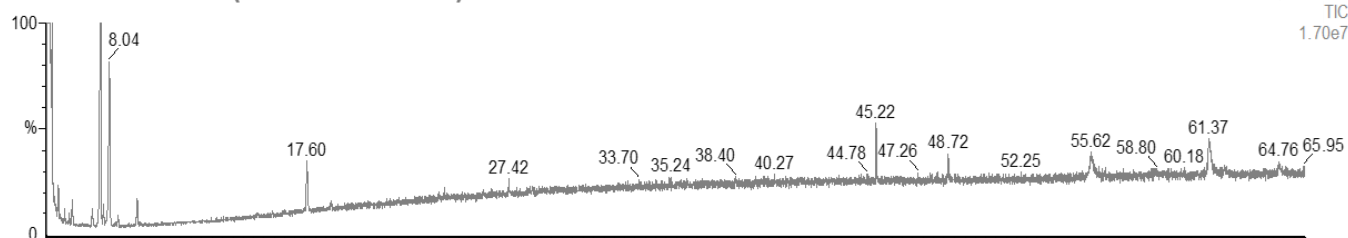

## HPLC ACN+ BSTFA (with extraction)

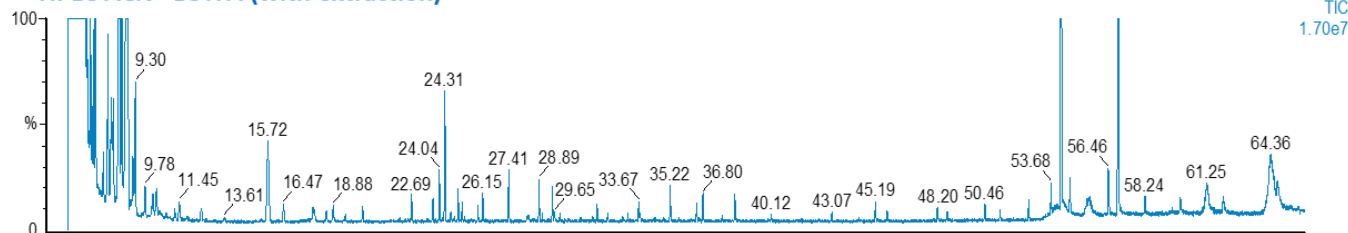

## ULC/MS-CC/SFC ACN+ BSTFA (with extraction)

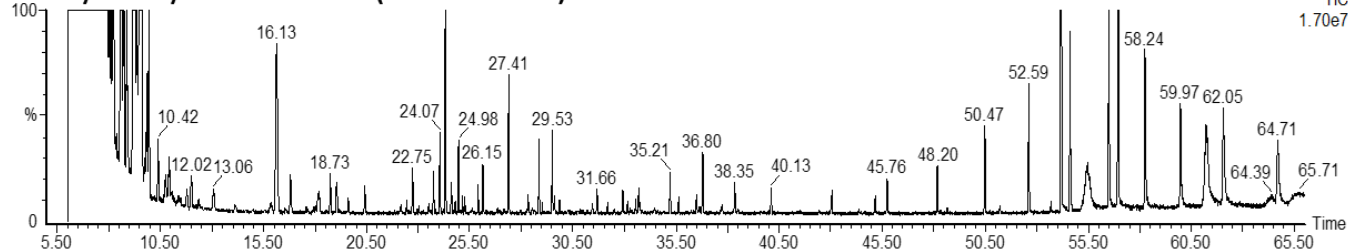

75

**Figure S11.** Comparison of chromatograms obtained with GC-MS to assess the influence of different solvent levels used for filter extraction in the presence of the derivatization reagent BSTFA with and without heating. The top panel shows a blank chromatogram of acetonitrile HPLC grade and BSTFA directly injected, the middle panel shows a blank chromatogram of acetonitrile HPLC grade and BSTFA that underwent heating (according to the derivatization protocol), and the bottom panel shows a blank chromatogram of acetonitrile ULC/MS-CC/SFC grade (higher purity grade compared to HPLC) and BSTFA that underwent heating (according to the derivatization protocol).

80

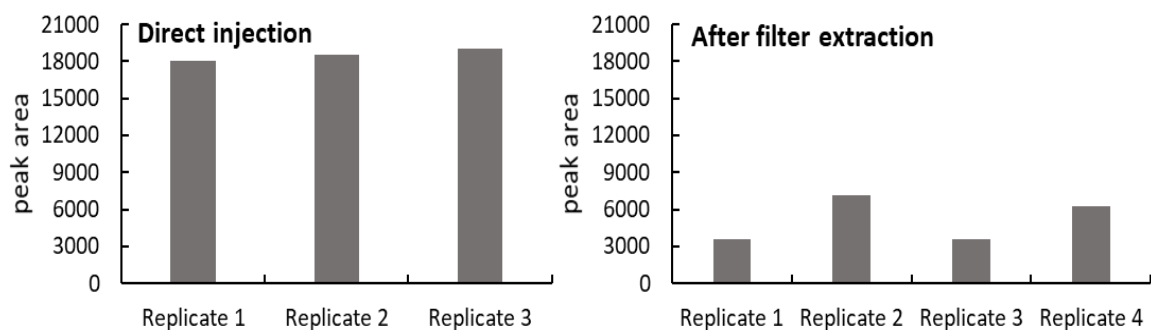

**Figure S12.** Heptanoic acid repeatability evaluation by GC-MS from a solution directly injected (left) and after extraction on filter (right).

85

**Table S4.** LOD comparison of some markers observed in this study with those previously reported in the literature associated with the analysis of aerosol samples.

| Compound name                                   | This study LOD                        | Literature LOD                                                                  | Reference                                        | Technique                  |
|-------------------------------------------------|---------------------------------------|---------------------------------------------------------------------------------|--------------------------------------------------|----------------------------|
| cis-pinonic acid <sup>b</sup>                   | 240 ng                                | 6.7 ng<br>2.2-7.5 ng                                                            | Chiappini et al. (2006)<br>Albinet et al. (2019) | SFE-GC-MS<br>GC-MS         |
| Pinic acid <sup>b</sup>                         | 380 ng                                | 1.2 ng<br>6.3-7.6 ng                                                            | Chiappini et al. (2006)<br>Albinet et al. (2019) | SFE-GC-MS<br>GC-MS         |
| Norpinic acid <sup>a</sup>                      | 190 ng mL <sup>-1</sup>               | 1.5 ng mL <sup>-1</sup>                                                         | Amarandei et al. (2023)                          | LC-MS                      |
| Terebic acid <sup>a</sup>                       | 240 ng mL <sup>-1</sup>               | 5.7 ng mL <sup>-1</sup><br>0.7 ng mL <sup>-1</sup>                              | King et al. (2019)<br>Amarandei et al. (2023)    | LC-Orbitrap<br>LC-MS       |
| MBTCA <sup>a</sup>                              | 255 ng mL <sup>-1</sup>               | 2.7 ng mL <sup>-1</sup><br>0.9 ng mL <sup>-1</sup>                              | King et al. (2019)<br>Amarandei et al. (2023)    | LC-Orbitrap<br>LC-MS       |
| (1S,2S,3R,5S)-(+)-<br>Pinanediol <sup>b</sup>   | 400 ng                                |                                                                                 |                                                  |                            |
| 1R-(+)-Nopinone <sup>b</sup>                    | 37 ng                                 |                                                                                 |                                                  |                            |
| $\alpha$ -methylglyceric acid <sup>b</sup>      | 560 ng                                | 1.1-2.6 ng                                                                      | Albinet et al. (2019)                            | GC-MS                      |
| 2-methylerytritol <sup>b</sup>                  | 0.1 ng                                | 1.1-4.2 ng                                                                      | Albinet et al. (2019)                            | GC-MS                      |
| 4-nitrocatechol <sup>a</sup>                    | 160 ng mL <sup>-1</sup>               | 1.0 ng mL <sup>-1</sup>                                                         | Ikemori et al. (2019)                            | LC-MS/MS                   |
| Syringaldehyde <sup>a</sup>                     | 707 ng mL <sup>-1</sup>               | 45.5 ng mL <sup>-1</sup>                                                        | Hoffmann et al. (2007)                           | LC-MS                      |
| 4-methyl-phthalic acid <sup>a</sup>             | 150 ng mL <sup>-1</sup>               | 0.6 ng mL <sup>-1</sup>                                                         | Ikemori et al. (2019)                            | GC-MS                      |
| Phthalic acid <sup>a</sup>                      | 44 ng or<br>220 ng mL <sup>-1</sup>   | 20 ng<br>8.9 ng mL <sup>-1</sup>                                                | Albinet et al. (2019)<br>Amarandei et al. (2023) | LC-MS/MS<br>LC-MS          |
| DHOPA <sup>b</sup>                              | 250 ng or<br>1000 ng mL <sup>-1</sup> | 1.0 ng mL <sup>-1</sup><br>3.7-11.0 ng                                          | Ikemori et al. (2019)<br>Albinet et al. (2019)   | GC-MS<br>GC-MS             |
| 2,5-dihydroxy benzoic<br>acid <sup>a</sup>      | 260 ng mL <sup>-1</sup>               |                                                                                 |                                                  |                            |
| Succinic acid <sup>b</sup>                      | 320 ng                                | 1.0-1.3 ng                                                                      | Albinet et al. (2019)                            | GC-MS                      |
| Glycolic acid <sup>b</sup>                      | 370 ng                                | 1.6 ng                                                                          | Kitanovski et al. (2011)                         | LC-MS                      |
| 3-acetyl-benzoic acid <sup>a</sup>              | 180 ng mL <sup>-1</sup>               |                                                                                 |                                                  |                            |
| Salicylic acid <sup>a</sup>                     | 115 ng mL <sup>-1</sup>               | 10.2 ng mL <sup>-1</sup>                                                        | King et al. (2019)                               | LC-Orbitrap                |
| o-toluic acid <sup>b</sup>                      | 200 ng                                |                                                                                 |                                                  |                            |
| 4-Nitrophenol <sup>a</sup>                      | 17 ng mL <sup>-1</sup>                | 27.8 ng mL <sup>-1</sup><br>1.2 ng mL <sup>-1</sup><br>0.26 ng mL <sup>-1</sup> | Amarandei et al. (2023)                          | LC-MS<br>LC-MS/MS<br>LC-MS |
| 2-methyl-4-nitrophenol <sup>a</sup>             | 22 ng mL <sup>-1</sup>                | 22 ng mL <sup>-1</sup><br>0.64 ng mL <sup>-1</sup>                              | Hoffmann et al. (2007)<br>Ikemori et al. (2019)  | LC-MS<br>LC-MS/MS          |
| 2-hydroxy-3-<br>methylbenzaldehyde <sup>b</sup> | 280 ng                                |                                                                                 |                                                  |                            |

<sup>a</sup> when measurements were performed using UPLC/ESI-IMS-QTOFMS, <sup>b</sup> when measurements were performed using GC-MS.

## References

- 95 Albinet, A., Lanzafame, G. M., Srivastava, D., Bonnaire, N., Nalin, F., and Wise, S. A.: Analysis and determination of secondary organic aerosol (SOA) tracers (markers) in particulate matter standard reference material (SRM 1649b, urban dust), *Anal. Bioanal. Chem.*, 411, 5975–5983, <https://doi.org/10.1007/s00216-019-02015-6>, 2019.
- Amarandei, C., Olariu, R. I., and Arsene, C.: Offline analysis of secondary formation markers in ambient organic aerosols by liquid chromatography coupled with time-of-flight mass spectrometry, *Journal of Chromatography A*, 1702, 464092, <https://doi.org/10.1016/j.chroma.2023.464092>, 2023.
- 100 Chiappini, L., Perraudin, E., Durand-Jolibois, R., and Doussin, J. F.: Development of a supercritical fluid extraction–gas chromatography–mass spectrometry method for the identification of highly polar compounds in secondary organic aerosols formed from biogenic hydrocarbons in smog chamber experiments, *Anal. Bioanal. Chem.*, 386, 1749–1759, <https://doi.org/10.1007/s00216-006-0744-3>, 2006.
- 105 Hoffmann, D., Iinuma, Y., and Herrmann, H.: Development of a method for fast analysis of phenolic molecular markers in biomass burning particles using high performance liquid chromatography/atmospheric pressure chemical ionisation mass spectrometry, *J. Chromatogr. A*, 1143, 168–175, <https://doi.org/10.1016/j.chroma.2007.01.035>, 2007.
- Ikemori, F., Nakayama, T., and Hasegawa, H.: Characterization and possible sources of nitrated mono- and di-aromatic hydrocarbons containing hydroxyl and/or carboxyl functional groups in ambient particles in Nagoya, Japan, *Atmos. Environ.*, 211, 91–102, <https://doi.org/10.1016/j.atmosenv.2019.05.009>, 2019.
- 110 King, A. C. F., Giorio, C., Wolff, E., Thomas, E., Karroca, O., Roverso, M., Schwikowski, M., Tapparo, A., Gambaro, A., and Kalberer, M.: A new method for the determination of primary and secondary terrestrial and marine biomarkers in ice cores using liquid chromatography high-resolution mass spectrometry, *Talanta*, 194, 233–242, <https://doi.org/10.1016/j.talanta.2018.10.042>, 2019.
- 115 Kitanovski, Z., Grgić, I., and Veber, M.: Characterization of carboxylic acids in atmospheric aerosols using hydrophilic interaction liquid chromatography tandem mass spectrometry, *Journal of Chromatography A*, 1218, 4417–4425, <https://doi.org/10.1016/j.chroma.2011.05.020>, 2011.
